# Supplementary material for: “Heaven” of Data Deficient Species: The Conservation Status of the Endemic Amphibian Fauna of Vietnam
Source: MDPI journal article supplement (doi:10.3390/d15070872), 2023-07-19
Supplement: s1 [file s1]

Archive with 1 entries (1 files):
- diversity-2282291-supplementary.pdf
