# Supplementary material for: “Heaven” of Data Deficient Species: The Conservation Status of the Endemic Amphibian Fauna of Vietnam
Source: MDPI journal article supplement (doi:10.3390/d15070872), 2023-07-19
Supplement: s1 [file s1 › diversity-2282291-supplementary.pdf]

## Supplementary materials

**Table S1.** List of the amphibians of Vietnam, based on the Amphibia Web

(<https://amphibiaweb.org/>) database (accessed on 19.01.2023)

| Scientific Name                       | IUCN Red List Status          | Family         | Order | Biogeographic status |
|---------------------------------------|-------------------------------|----------------|-------|----------------------|
| <i>Amolops chunganensis</i>           | Least Concern (LC)            | Ranidae        | Anura | Not endemic          |
| <i>Amolops compotrix</i>              | Least Concern (LC)            | Ranidae        | Anura | Not endemic          |
| <i>Amolops cremnobatus</i>            | Least Concern (LC)            | Ranidae        | Anura | Not endemic          |
| <i>Amolops cucae</i>                  | Endangered (EN)               | Ranidae        | Anura | Endemic              |
| <i>Amolops daorum</i>                 |                               | Ranidae        | Anura | Not endemic          |
| <i>Amolops iriodes</i>                | Data Deficient (DD)           | Ranidae        | Anura | Endemic              |
| <i>Amolops minutus</i>                | Endangered (EN)               | Ranidae        | Anura | Endemic              |
| <i>Amolops ottorum</i>                |                               | Ranidae        | Anura | Endemic              |
| <i>Amolops ricketti</i>               | Least Concern (LC)            | Ranidae        | Anura | Not endemic          |
| <i>Amolops shihaitaoi</i>             |                               | Ranidae        | Anura | Not endemic          |
| <i>Amolops spinapectoralis</i>        | Least Concern (LC)            | Ranidae        | Anura | Endemic              |
| <i>Amolops splendissimus</i>          | Vulnerable (VU)               | Ranidae        | Anura | Not endemic          |
| <i>Amolops viridimaculatus</i>        | Near Threatened (NT)          | Ranidae        | Anura | Not endemic          |
| <i>Amolops wenshanensis</i>           | Data Deficient (DD)           | Ranidae        | Anura | Not endemic          |
| <i>Bombina microdeladigitata</i>      |                               | Bombinatoridae | Anura | Not endemic          |
| <i>Boulenophrys caobangensis</i>      |                               | Megophryidae   | Anura | Endemic              |
| <i>Boulenophrys fansipanensis</i>     |                               | Megophryidae   | Anura | Endemic              |
| <i>Boulenophrys frigida</i>           | Endangered (EN) - Provisional | Megophryidae   | Anura | Endemic              |
| <i>Boulenophrys hoanglienensis</i>    |                               | Megophryidae   | Anura | Endemic              |
| <i>Boulenophrys jingdongensis</i>     | Least Concern (LC)            | Megophryidae   | Anura | Not endemic          |
| <i>Boulenophrys minor</i>             | Least Concern (LC)            | Megophryidae   | Anura | Not endemic          |
| <i>Boulenophrys omeimontis</i>        | Near Threatened (NT)          | Megophryidae   | Anura | Not endemic          |
| <i>Boulenophrys palpebralespinosa</i> | Least Concern (LC)            | Megophryidae   | Anura | Not endemic          |
| <i>Boulenophrys rubrimera</i>         |                               | Megophryidae   | Anura | Not endemic          |
| <i>Brachytarsophrys intermedia</i>    | Least Concern (LC)            | Megophryidae   | Anura | Not endemic          |
| <i>Bufo cryptotympanicus</i>          | Near Threatened (NT)          | Bufonidae      | Anura | Not endemic          |

|                                   |                            |                |             |             |
|-----------------------------------|----------------------------|----------------|-------------|-------------|
| <i>Bufo luchunnicus</i>           | Critically Endangered (CR) | Bufonidae      | Anura       | Not endemic |
| <i>Bufo pageoti</i>               | Near Threatened (NT)       | Bufonidae      | Anura       | Not endemic |
| <i>Chiromantis doriae</i>         | Least Concern (LC)         | Rhacophoridae  | Anura       | Not endemic |
| <i>Chiromantis nongkhorensis</i>  | Least Concern (LC)         | Rhacophoridae  | Anura       | Not endemic |
| <i>Duttaphrynus melanostictus</i> | Least Concern (LC)         | Bufonidae      | Anura       | Not endemic |
| <i>Feihyla palpebralis</i>        | Near Threatened (NT)       | Rhacophoridae  | Anura       | Not endemic |
| <i>Feihyla vittata</i>            | Least Concern (LC)         | Rhacophoridae  | Anura       | Not endemic |
| <i>Fejervarya cancrivora</i>      | Least Concern (LC)         | Dicroglossidae | Anura       | Not endemic |
| <i>Fejervarya limnocharis</i>     | Least Concern (LC)         | Dicroglossidae | Anura       | Not endemic |
| <i>Glyphoglossus guttulatus</i>   | Least Concern (LC)         | Microhylidae   | Anura       | Not endemic |
| <i>Glyphoglossus molossus</i>     | Near Threatened (NT)       | Microhylidae   | Anura       | Not endemic |
| <i>Gracixalus gracilipes</i>      | Least Concern (LC)         | Rhacophoridae  | Anura       | Not endemic |
| <i>Gracixalus jinxiuensis</i>     | Vulnerable (VU)            | Rhacophoridae  | Anura       | Not endemic |
| <i>Gracixalus lumarius</i>        | Endangered (EN)            | Rhacophoridae  | Anura       | Endemic     |
| <i>Gracixalus quangi</i>          | Vulnerable (VU)            | Rhacophoridae  | Anura       | Not endemic |
| <i>Gracixalus quyeti</i>          | Endangered (EN)            | Rhacophoridae  | Anura       | Endemic     |
| <i>Gracixalus sapaensis</i>       |                            | Rhacophoridae  | Anura       | Endemic     |
| <i>Gracixalus supercornutus</i>   | Near Threatened (NT)       | Rhacophoridae  | Anura       | Not endemic |
| <i>Gracixalus trieng</i>          |                            | Rhacophoridae  | Anura       | Endemic     |
| <i>Gracixalus waza</i>            |                            | Rhacophoridae  | Anura       | Endemic     |
| <i>Gracixalus yunnanensis</i>     |                            | Rhacophoridae  | Anura       | Not endemic |
| <i>Gracixalus zieglerei</i>       |                            | Rhacophoridae  | Anura       | Endemic     |
| <i>Hoplobatrachus rugulosus</i>   | Least Concern (LC)         | Dicroglossidae | Anura       | Not endemic |
| <i>Humerana miopus</i>            | Least Concern (LC)         | Ranidae        | Anura       | Not endemic |
| <i>Hydrophylax leptoglossa</i>    | Least Concern (LC)         | Ranidae        | Anura       | Not endemic |
| <i>Hyla annectans</i>             | Least Concern (LC)         | Hylidae        | Anura       | Not endemic |
| <i>Hyla chinensis</i>             | Least Concern (LC)         | Hylidae        | Anura       | Not endemic |
| <i>Hyla simplex</i>               | Least Concern (LC)         | Hylidae        | Anura       | Not endemic |
| <i>Hylarana attigua</i>           | Least Concern (LC)         | Ranidae        | Anura       | Not endemic |
| <i>Hylarana erythraea</i>         | Least Concern (LC)         | Ranidae        | Anura       | Not endemic |
| <i>Hylarana macrodactyla</i>      | Least Concern (LC)         | Ranidae        | Anura       | Not endemic |
| <i>Hylarana montivaga</i>         | Endangered (EN)            | Ranidae        | Anura       | Not endemic |
| <i>Hylarana taipehensis</i>       | Least Concern (LC)         | Ranidae        | Anura       | Not endemic |
| <i>Ichthyophis catlocensis</i>    |                            | Ichthyophiidae | Gymnophiona | Endemic     |
| <i>Ichthyophis chaloensis</i>     |                            | Ichthyophiidae | Gymnophiona | Endemic     |
| <i>Ichthyophis nguyenorum</i>     | Least Concern (LC)         | Ichthyophiidae | Gymnophiona | Endemic     |
| <i>Ingerophrynus galeatus</i>     | Least Concern (LC)         | Bufonidae      | Anura       | Not endemic |

|                             |                               |               |       |             |
|-----------------------------|-------------------------------|---------------|-------|-------------|
| Ingerophrynus macrotis      | Least Concern (LC)            | Bufonidae     | Anura | Not endemic |
| Kalophrynus cryptophonus    | Endangered (EN)               | Microhylidae  | Anura | Endemic     |
| Kalophrynus honbaensis      | Vulnerable (VU)               | Microhylidae  | Anura | Endemic     |
| Kalophrynus interlineatus   | Least Concern (LC)            | Microhylidae  | Anura | Not endemic |
| Kaloula indochinensis       |                               | Microhylidae  | Anura | Not endemic |
| Kaloula macrocephala        | Data Deficient (DD)           | Microhylidae  | Anura | Endemic     |
| Kaloula pulchra             | Least Concern (LC)            | Microhylidae  | Anura | Not endemic |
| Kurixalus ananjevae         | Data Deficient (DD)           | Rhacophoridae | Anura | Endemic     |
| Kurixalus appendiculatus    | Least Concern (LC)            | Rhacophoridae | Anura | Not endemic |
| Kurixalus baliogaster       | Least Concern (LC)            | Rhacophoridae | Anura | Not endemic |
| Kurixalus banaensis         | Data Deficient (DD)           | Rhacophoridae | Anura | Endemic     |
| Kurixalus bisacculus        | Least Concern (LC)            | Rhacophoridae | Anura | Not endemic |
| Kurixalus gracilloides      |                               | Rhacophoridae | Anura | Endemic     |
| Kurixalus motokawai         |                               | Rhacophoridae | Anura | Endemic     |
| Kurixalus odontotarsus      | Least Concern (LC)            | Rhacophoridae | Anura | Not endemic |
| Kurixalus verrucosus        | Least Concern (LC)            | Rhacophoridae | Anura | Not endemic |
| Kurixalus viridescens       |                               | Rhacophoridae | Anura | Endemic     |
| Leptobrachella aerea        | Least Concern (LC)            | Megophryidae  | Anura | Not endemic |
| Leptobrachella applebyi     | Endangered (EN)               | Megophryidae  | Anura | Endemic     |
| Leptobrachella ardens       |                               | Megophryidae  | Anura | Endemic     |
| Leptobrachella bidoupensis  | Endangered (EN)               | Megophryidae  | Anura | Endemic     |
| Leptobrachella botsfordi    | Critically Endangered (CR)    | Megophryidae  | Anura | Endemic     |
| Leptobrachella bourreti     | Data Deficient (DD)           | Megophryidae  | Anura | Endemic     |
| Leptobrachella crocea       | Data Deficient (DD)           | Megophryidae  | Anura | Endemic     |
| Leptobrachella eos          |                               | Megophryidae  | Anura | Not endemic |
| Leptobrachella firthi       | Endangered (EN)               | Megophryidae  | Anura | Endemic     |
| Leptobrachella graminicola  |                               | Megophryidae  | Anura | Endemic     |
| Leptobrachella kalonensis   |                               | Megophryidae  | Anura | Endemic     |
| Leptobrachella macrops      |                               | Megophryidae  | Anura | Endemic     |
| Leptobrachella maculosa     |                               | Megophryidae  | Anura | Endemic     |
| Leptobrachella nahangensis  | Data Deficient (DD)           | Megophryidae  | Anura | Endemic     |
| Leptobrachella namdongensis |                               | Megophryidae  | Anura | Endemic     |
| Leptobrachella nyx          |                               | Megophryidae  | Anura | Endemic     |
| Leptobrachella pallida      |                               | Megophryidae  | Anura | Endemic     |
| Leptobrachella petrops      | Vulnerable (VU) - Provisional | Megophryidae  | Anura | Endemic     |
| Leptobrachella pluvialis    | Endangered (EN)               | Megophryidae  | Anura | Endemic     |
| Leptobrachella pyrrhops     |                               | Megophryidae  | Anura | Endemic     |
| Leptobrachella rowleyae     |                               | Megophryidae  | Anura | Endemic     |
| Leptobrachella sungi        | Least Concern (LC)            | Megophryidae  | Anura | Not endemic |

|                               |                      |                |       |             |
|-------------------------------|----------------------|----------------|-------|-------------|
| Leptobrachella tadungensis    |                      | Megophryidae   | Anura | Endemic     |
| Leptobrachella tuberosa       | Least Concern (LC)   | Megophryidae   | Anura | Endemic     |
| Leptobrachella ventripunctata | Data Deficient (DD)  | Megophryidae   | Anura | Not endemic |
| Leptobrachium banae           | Least Concern (LC)   | Megophryidae   | Anura | Not endemic |
| Leptobrachium chapaense       | Least Concern (LC)   | Megophryidae   | Anura | Not endemic |
| Leptobrachium guangxiense     |                      | Megophryidae   | Anura | Not endemic |
| Leptobrachium leucops         | Vulnerable (VU)      | Megophryidae   | Anura | Endemic     |
| Leptobrachium lunatum         |                      | Megophryidae   | Anura | Not endemic |
| Leptobrachium mouhoti         | Least Concern (LC)   | Megophryidae   | Anura | Not endemic |
| Leptobrachium ngoclinhense    | Endangered (EN)      | Megophryidae   | Anura | Endemic     |
| Leptobrachium pullum          | Least Concern (LC)   | Megophryidae   | Anura | Not endemic |
| Leptobrachium xanthospilum    | Data Deficient (DD)  | Megophryidae   | Anura | Endemic     |
| Limnonectes bannaensis        |                      | Dicroglossidae | Anura | Not endemic |
| Limnonectes blythii           | Near Threatened (NT) | Dicroglossidae | Anura | Not endemic |
| Limnonectes dabanus           | Least Concern (LC)   | Dicroglossidae | Anura | Endemic     |
| Limnonectes hascheanus        | Least Concern (LC)   | Dicroglossidae | Anura | Not endemic |
| Limnonectes khammonensis      | Data Deficient (DD)  | Dicroglossidae | Anura | Not endemic |
| Limnonectes kiziriani         |                      | Dicroglossidae | Anura | Endemic     |
| Limnonectes kohchangae        | Least Concern (LC)   | Dicroglossidae | Anura | Not endemic |
| Limnonectes nguyenorum        |                      | Dicroglossidae | Anura | Endemic     |
| Limnonectes phuyenensis       |                      | Dicroglossidae | Anura | Endemic     |
| Limnonectes poilani           | Least Concern (LC)   | Dicroglossidae | Anura | Not endemic |
| Limnonectes quangninhensis    |                      | Dicroglossidae | Anura | Endemic     |
| Liuixalus calcarius           |                      | Rhacophoridae  | Anura | Endemic     |
| Liuixalus catbaensis          |                      | Rhacophoridae  | Anura | Endemic     |
| Microhyla annamensis          | Vulnerable (VU)      | Microhylidae   | Anura | Not endemic |
| Microhyla arboricola          | Vulnerable (VU)      | Microhylidae   | Anura | Endemic     |
| Microhyla aurantiventris      |                      | Microhylidae   | Anura | Endemic     |
| Microhyla berdmorei           | Least Concern (LC)   | Microhylidae   | Anura | Not endemic |
| Microhyla butleri             | Least Concern (LC)   | Microhylidae   | Anura | Not endemic |
| Microhyla daklakensis         |                      | Microhylidae   | Anura | Endemic     |
| Microhyla darevskii           |                      | Microhylidae   | Anura | Endemic     |
| Microhyla fissipes            | Least Concern (LC)   | Microhylidae   | Anura | Not endemic |
| Microhyla heymonsi            | Least Concern (LC)   | Microhylidae   | Anura | Not endemic |
| Microhyla hmongorum           |                      | Microhylidae   | Anura | Not endemic |
| Microhyla hongiaoensis        |                      | Microhylidae   | Anura | Endemic     |
| Microhyla marmorata           | Least Concern (LC)   | Microhylidae   | Anura | Not endemic |
| Microhyla minuta              |                      | Microhylidae   | Anura | Endemic     |
| Microhyla nanapollexa         | Data Deficient (DD)  | Microhylidae   | Anura | Endemic     |

|                                 |                            |                |       |             |
|---------------------------------|----------------------------|----------------|-------|-------------|
| <i>Microhyla neglecta</i>       |                            | Microhylidae   | Anura | Endemic     |
| <i>Microhyla ninhthuanensis</i> |                            | Microhylidae   | Anura | Endemic     |
| <i>Microhyla picta</i>          | Data Deficient (DD)        | Microhylidae   | Anura | Endemic     |
| <i>Microhyla pineticola</i>     | Vulnerable (VU)            | Microhylidae   | Anura | Endemic     |
| <i>Microhyla pulchella</i>      | Endangered (EN)            | Microhylidae   | Anura | Endemic     |
| <i>Microhyla pulchra</i>        | Least Concern (LC)         | Microhylidae   | Anura | Not endemic |
| <i>Microhyla xodangorum</i>     |                            | Microhylidae   | Anura | Endemic     |
| <i>Micryletta erythropoda</i>   | Data Deficient (DD)        | Microhylidae   | Anura | Endemic     |
| <i>Micryletta inornata</i>      | Least Concern (LC)         | Microhylidae   | Anura | Not endemic |
| <i>Micryletta melanops</i>      |                            | Microhylidae   | Anura | Endemic     |
| <i>Micryletta nigromaculata</i> |                            | Microhylidae   | Anura | Endemic     |
| <i>Nanorana aenea</i>           | Least Concern (LC)         | Dicroglossidae | Anura | Not endemic |
| <i>Nanorana yunnanensis</i>     | Endangered (EN)            | Dicroglossidae | Anura | Not endemic |
| <i>Nidirana chapaensis</i>      | Least Concern (LC)         | Ranidae        | Anura | Not endemic |
| <i>Nidirana lini</i>            | Data Deficient (DD)        | Ranidae        | Anura | Not endemic |
| <i>Nyctixalus pictus</i>        | Near Threatened (NT)       | Rhacophoridae  | Anura | Not endemic |
| <i>Occidozyga lima</i>          | Least Concern (LC)         | Dicroglossidae | Anura | Not endemic |
| <i>Odorrana absita</i>          | Least Concern (LC)         | Ranidae        | Anura | Not endemic |
| <i>Odorrana andersonii</i>      | Least Concern (LC)         | Ranidae        | Anura | Not endemic |
| <i>Odorrana bacboensis</i>      | Least Concern (LC)         | Ranidae        | Anura | Not endemic |
| <i>Odorrana banaorum</i>        | Least Concern (LC)         | Ranidae        | Anura | Endemic     |
| <i>Odorrana chapaensis</i>      | Near Threatened (NT)       | Ranidae        | Anura | Not endemic |
| <i>Odorrana chloronota</i>      | Least Concern (LC)         | Ranidae        | Anura | Not endemic |
| <i>Odorrana geminata</i>        | Vulnerable (VU)            | Ranidae        | Anura | Not endemic |
| <i>Odorrana gigatympana</i>     | Data Deficient (DD)        | Ranidae        | Anura | Endemic     |
| <i>Odorrana grahami</i>         | Near Threatened (NT)       | Ranidae        | Anura | Not endemic |
| <i>Odorrana hmongorum</i>       |                            | Ranidae        | Anura | Endemic     |
| <i>Odorrana khalam</i>          | Least Concern (LC)         | Ranidae        | Anura | Not endemic |
| <i>Odorrana lipuensis</i>       |                            | Ranidae        | Anura | Not endemic |
| <i>Odorrana morafkai</i>        | Least Concern (LC)         | Ranidae        | Anura | Endemic     |
| <i>Odorrana mutschmanni</i>     |                            | Ranidae        | Anura | Endemic     |
| <i>Odorrana nasica</i>          | Least Concern (LC)         | Ranidae        | Anura | Not endemic |
| <i>Odorrana orba</i>            | Least Concern (LC)         | Ranidae        | Anura | Not endemic |
| <i>Odorrana trankieni</i>       | Data Deficient (DD)        | Ranidae        | Anura | Endemic     |
| <i>Odorrana yentuensis</i>      | Endangered (EN)            | Ranidae        | Anura | Endemic     |
| <i>Ophryophryne elfina</i>      |                            | Megophryidae   | Anura | Endemic     |
| <i>Ophryophryne gerti</i>       | Data Deficient (DD)        | Megophryidae   | Anura | Not endemic |
| <i>Ophryophryne hansui</i>      | Data Deficient (DD)        | Megophryidae   | Anura | Not endemic |
| <i>Ophryophryne kouei</i>       | Least Concern (LC)         | Megophryidae   | Anura | Not endemic |
| <i>Ophryophryne microstoma</i>  | Least Concern (LC)         | Megophryidae   | Anura | Not endemic |
| <i>Oreolalax sterlingae</i>     | Critically Endangered (CR) | Megophryidae   | Anura | Endemic     |

|                                    |                      |                |         |             |
|------------------------------------|----------------------|----------------|---------|-------------|
| <i>Papurana milleti</i>            | Least Concern (LC)   | Ranidae        | Anura   | Not endemic |
| <i>Paramesotriton deloustali</i>   | Least Concern (LC)   | Salamandridae  | Caudata | Endemic     |
| <i>Paramesotriton guangxiensis</i> | Endangered (EN)      | Salamandridae  | Caudata | Not endemic |
| <i>Pelophylax lateralis</i>        | Least Concern (LC)   | Ranidae        | Anura   | Not endemic |
| <i>Philautus abditus</i>           | Data Deficient (DD)  | Rhacophoridae  | Anura   | Endemic     |
| <i>Philautus catbaensis</i>        |                      | Rhacophoridae  | Anura   | Endemic     |
| <i>Philautus maosonensis</i>       | Data Deficient (DD)  | Rhacophoridae  | Anura   | Endemic     |
| <i>Phrynoglossus martensii</i>     | Least Concern (LC)   | Dicroglossidae | Anura   | Not endemic |
| <i>Phrynoidis asper</i>            | Least Concern (LC)   | Bufo           | Anura   | Not endemic |
| <i>Polypedates colletti</i>        | Least Concern (LC)   | Rhacophoridae  | Anura   | Not endemic |
| <i>Polypedates leucomystax</i>     | Least Concern (LC)   | Rhacophoridae  | Anura   | Not endemic |
| <i>Polypedates megacephalus</i>    | Least Concern (LC)   | Rhacophoridae  | Anura   | Not endemic |
| <i>Polypedates mutus</i>           | Least Concern (LC)   | Rhacophoridae  | Anura   | Not endemic |
| <i>Quasipaa acanthophora</i>       | Vulnerable (VU)      | Dicroglossidae | Anura   | Endemic     |
| <i>Quasipaa delacouri</i>          | Least Concern (LC)   | Dicroglossidae | Anura   | Not endemic |
| <i>Quasipaa spinosa</i>            | Vulnerable (VU)      | Dicroglossidae | Anura   | Not endemic |
| <i>Quasipaa taoi</i>               |                      | Dicroglossidae | Anura   | Not endemic |
| <i>Quasipaa verrucospinosa</i>     | Near Threatened (NT) | Dicroglossidae | Anura   | Not endemic |
| <i>Rana johnsi</i>                 | Least Concern (LC)   | Ranidae        | Anura   | Not endemic |
| <i>Raorchestes gryllus</i>         | Vulnerable (VU)      | Rhacophoridae  | Anura   | Endemic     |
| <i>Raorchestes parvulus</i>        | Least Concern (LC)   | Rhacophoridae  | Anura   | Not endemic |
| <i>Rhacophorus annamensis</i>      | Least Concern (LC)   | Rhacophoridae  | Anura   | Endemic     |
| <i>Rhacophorus bipunctatus</i>     | Least Concern (LC)   | Rhacophoridae  | Anura   | Not endemic |
| <i>Rhacophorus calcaneus</i>       | Endangered (EN)      | Rhacophoridae  | Anura   | Not endemic |
| <i>Rhacophorus exechopygus</i>     | Least Concern (LC)   | Rhacophoridae  | Anura   | Not endemic |
| <i>Rhacophorus helenae</i>         | Endangered (EN)      | Rhacophoridae  | Anura   | Endemic     |
| <i>Rhacophorus hoabinhensis</i>    |                      | Rhacophoridae  | Anura   | Endemic     |
| <i>Rhacophorus hoanglienensis</i>  | Data Deficient (DD)  | Rhacophoridae  | Anura   | Endemic     |
| <i>Rhacophorus kio</i>             | Least Concern (LC)   | Rhacophoridae  | Anura   | Not endemic |
| <i>Rhacophorus larissae</i>        |                      | Rhacophoridae  | Anura   | Endemic     |
| <i>Rhacophorus marmoridorsum</i>   | Vulnerable (VU)      | Rhacophoridae  | Anura   | Endemic     |
| <i>Rhacophorus orlovi</i>          | Least Concern (LC)   | Rhacophoridae  | Anura   | Not endemic |
| <i>Rhacophorus rhodopus</i>        | Least Concern (LC)   | Rhacophoridae  | Anura   | Not endemic |
| <i>Rhacophorus robertingeri</i>    | Least Concern (LC)   | Rhacophoridae  | Anura   | Endemic     |
| <i>Rhacophorus vampyrus</i>        | Endangered (EN)      | Rhacophoridae  | Anura   | Endemic     |
| <i>Rhacophorus vanbanicus</i>      |                      | Rhacophoridae  | Anura   | Endemic     |
| <i>Rhacophorus viridimaculatus</i> |                      | Rhacophoridae  | Anura   | Endemic     |
| <i>Sylvirana annamitica</i>        |                      | Ranidae        | Anura   | Not endemic |
| <i>Sylvirana guentheri</i>         | Least Concern (LC)   | Ranidae        | Anura   | Not endemic |

|                                    |                                   |               |         |             |
|------------------------------------|-----------------------------------|---------------|---------|-------------|
| <i>Sylvirana maosonensis</i>       | Least Concern (LC)                | Ranidae       | Anura   | Not endemic |
| <i>Sylvirana montosa</i>           |                                   | Ranidae       | Anura   | Not endemic |
| <i>Sylvirana nigrovittata</i>      | Least Concern (LC)                | Ranidae       | Anura   | Not endemic |
| <i>Theloderma annae</i>            |                                   | Rhacophoridae | Anura   | Endemic     |
| <i>Theloderma asperum</i>          | Least Concern (LC)                | Rhacophoridae | Anura   | Not endemic |
| <i>Theloderma auratum</i>          |                                   | Rhacophoridae | Anura   | Endemic     |
| <i>Theloderma bicolor</i>          | Endangered (EN)                   | Rhacophoridae | Anura   | Endemic     |
| <i>Theloderma corticale</i>        | Least Concern (LC)                | Rhacophoridae | Anura   | Endemic     |
| <i>Theloderma gordonii</i>         | Least Concern (LC)                | Rhacophoridae | Anura   | Not endemic |
| <i>Theloderma hekouense</i>        |                                   | Rhacophoridae | Anura   | Not endemic |
| <i>Theloderma khoii</i>            |                                   | Rhacophoridae | Anura   | Endemic     |
| <i>Theloderma kwangsiense</i>      | Data Deficient (DD)               | Rhacophoridae | Anura   | Not endemic |
| <i>Theloderma laeve</i>            | Data Deficient (DD)               | Rhacophoridae | Anura   | Endemic     |
| <i>Theloderma lateriticum</i>      | Least Concern (LC)                | Rhacophoridae | Anura   | Endemic     |
| <i>Theloderma licin</i>            | Least Concern (LC)                | Rhacophoridae | Anura   | Not endemic |
| <i>Theloderma nebulosum</i>        | Endangered (EN)                   | Rhacophoridae | Anura   | Endemic     |
| <i>Theloderma palliatum</i>        | Endangered (EN)                   | Rhacophoridae | Anura   | Endemic     |
| <i>Theloderma petilum</i>          | Vulnerable (VU)                   | Rhacophoridae | Anura   | Not endemic |
| <i>Theloderma rhododiscus</i>      | Near Threatened (NT)              | Rhacophoridae | Anura   | Not endemic |
| <i>Theloderma ryabovi</i>          | Endangered (EN)                   | Rhacophoridae | Anura   | Endemic     |
| <i>Theloderma stellatum</i>        | Least Concern (LC)                | Rhacophoridae | Anura   | Not endemic |
| <i>Theloderma truongsongense</i>   | Data Deficient (DD)               | Rhacophoridae | Anura   | Endemic     |
| <i>Theloderma vietnamense</i>      | Least Concern (LC)                | Rhacophoridae | Anura   | Not endemic |
| <i>Tylototriton anguliceps</i>     | Least Concern (LC)                | Salamandridae | Caudata | Not endemic |
| <i>Tylototriton asperrimus</i>     | Near Threatened (NT)              | Salamandridae | Caudata | Not endemic |
| <i>Tylototriton pasmansi</i>       |                                   | Salamandridae | Caudata | Endemic     |
| <i>Tylototriton sparreboomi</i>    |                                   | Salamandridae | Caudata | Endemic     |
| <i>Tylototriton thaiorum</i>       |                                   | Salamandridae | Caudata | Endemic     |
| <i>Tylototriton verrucosus</i>     | Least Concern (LC)                | Salamandridae | Caudata | Not endemic |
| <i>Tylototriton vietnamensis</i>   | Endangered (EN)                   | Salamandridae | Caudata | Endemic     |
| <i>Tylototriton zieglerei</i>      | Vulnerable (VU)                   | Salamandridae | Caudata | Endemic     |
| <i>Vietnamophryne cuongi</i>       | Endangered (EN) - Provisional     | Microhylidae  | Anura   | Endemic     |
| <i>Vietnamophryne inexpectata</i>  |                                   | Microhylidae  | Anura   | Endemic     |
| <i>Vietnamophryne occidentalis</i> | Data Deficient (DD) - Provisional | Microhylidae  | Anura   | Endemic     |
| <i>Vietnamophryne orlovi</i>       |                                   | Microhylidae  | Anura   | Endemic     |
| <i>Vietnamophryne vuquangensis</i> |                                   | Microhylidae  | Anura   | Endemic     |
| <i>Xenophrys longipes</i>          | Near Threatened (NT)              | Megophryidae  | Anura   | Not endemic |
| <i>Xenophrys major</i>             | Least Concern (LC)                | Megophryidae  | Anura   | Not endemic |
| <i>Xenophrys pachyproctus</i>      | Data Deficient (DD)               | Megophryidae  | Anura   | Not endemic |

|                               |                         |               |       |             |
|-------------------------------|-------------------------|---------------|-------|-------------|
| Xenophrys parva               | Least Concern (LC)      | Megophryidae  | Anura | Not endemic |
| Xenophrys<br>truongsonensis   |                         | Megophryidae  | Anura | Endemic     |
| Zhangixalus dennysi           | Least Concern (LC)      | Rhacophoridae | Anura | Not endemic |
| Zhangixalus dorsovireidis     | Data Deficient (DD)     | Rhacophoridae | Anura | Not endemic |
| Zhangixalus duboisi           | Data Deficient (DD)     | Rhacophoridae | Anura | Not endemic |
| Zhangixalus dugritei          | Least Concern (LC)      | Rhacophoridae | Anura | Not endemic |
| Zhangixalus feae              | Least Concern (LC)      | Rhacophoridae | Anura | Not endemic |
| Zhangixalus franki            |                         | Rhacophoridae | Anura | Endemic     |
| Zhangixalus hungfuensis       | Data Deficient (DD)     | Rhacophoridae | Anura | Not endemic |
| Zhangixalus jodiae            |                         | Rhacophoridae | Anura | Endemic     |
| Zhangixalus<br>nigropunctatus | Near Threatened<br>(NT) | Rhacophoridae | Anura | Not endemic |
| Zhangixalus omeimontis        | Least Concern (LC)      | Rhacophoridae | Anura | Not endemic |
| Zhangixalus puerensis         | Data Deficient (DD)     | Rhacophoridae | Anura | Not endemic |
| Zhangixalus smaragdinus       | Near Threatened<br>(NT) | Rhacophoridae | Anura | Not endemic |

**Table S2.** Endemic species of amphibians of Vietnam and comparison with two other countries from South-East Asia, Laos, and Cambodia. For each species, the IUCN (2018) redlist status is indicated. The species shared by the three countries are in bold. Data from the IUCN Red List database of threatened species (<https://www.iucnredlist.org/>; accessed on 22 January 2023).

| IUCN | Vietnam                                   | Laos                                      | Cambodia                             |
|------|-------------------------------------------|-------------------------------------------|--------------------------------------|
| CR   | <i>Bufo luchunnicus</i>                   |                                           |                                      |
|      | <i>Leptobranchella botsfordi</i>          |                                           |                                      |
|      | <i>Leptobranchella rowleyae</i>           |                                           |                                      |
|      |                                           |                                           | <i>Megophrys damrei</i>              |
| EN   | <i>Amolops cucae</i>                      |                                           |                                      |
|      | <i>Amolops minutus</i>                    |                                           |                                      |
|      | <i>Amolops ottorum</i>                    |                                           |                                      |
|      | <i>Gracixalus lumarius</i>                |                                           |                                      |
|      | <i>Gracixalus nonggangensis</i>           |                                           |                                      |
|      | <i>Gracixalus sapaensis</i>               |                                           |                                      |
|      | <i>Hylarana montivaga</i>                 |                                           |                                      |
|      | <i>Kalophrynus cryptophonus</i>           |                                           |                                      |
|      | <i>Kurixalus viridescens</i>              |                                           |                                      |
|      |                                           | <i>Laotriton laoensis</i>                 |                                      |
|      | <i>Leptobranchella applebyi</i>           |                                           |                                      |
|      | <i>Leptobranchella ardens</i>             |                                           |                                      |
|      | <i>Leptobranchella bidoupensis</i>        |                                           |                                      |
|      | <b><i>Leptobranchella firthi</i></b>      | <b><i>Leptobranchella firthi</i></b>      |                                      |
|      | <i>Leptobranchella kalonensis</i>         |                                           |                                      |
|      | <i>Leptobranchella macrops</i>            |                                           |                                      |
|      | <i>Leptobranchella maculosa</i>           |                                           |                                      |
|      | <b><i>Leptobranchella melica</i></b>      | <b><i>Leptobranchella melica</i></b>      | <b><i>Leptobranchella melica</i></b> |
|      | <i>Leptobranchella namdongensis</i>       |                                           |                                      |
|      | <i>Leptobranchella pallida</i>            |                                           |                                      |
|      | <i>Leptobranchella pluvialis</i>          |                                           |                                      |
|      | <b><i>Leptobranchella puhoatensis</i></b> | <b><i>Leptobranchella puhoatensis</i></b> |                                      |
|      | <i>Leptobranchella pyrrhops</i>           |                                           |                                      |
|      | <i>Leptobranchella tadungensis</i>        |                                           |                                      |
|      |                                           | <i>Leptobranchium buchardi</i>            |                                      |

|    |                                      |                                        |                                        |
|----|--------------------------------------|----------------------------------------|----------------------------------------|
|    | <i>Leptobrachium ngoclinhense</i>    |                                        |                                        |
|    | <i>Leptobrachium promustache</i>     |                                        |                                        |
|    | <b><i>Leptobrachium xanthops</i></b> | <b><i>Leptobrachium xanthops</i></b>   |                                        |
|    | <i>Leptobrachium xanthospilum</i>    |                                        |                                        |
|    | <i>Liuixalus calcarius</i>           |                                        |                                        |
|    | <i>Megophrys fansipanensis</i>       |                                        |                                        |
|    | <i>Megophrys gerti</i>               |                                        |                                        |
|    | <i>Megophrys hoanglienensis</i>      |                                        |                                        |
|    | <i>Megophrys rubrimera</i>           |                                        |                                        |
|    | <i>Micryletta nigromaculata</i>      |                                        |                                        |
|    | <i>Nanohyla pulchella</i>            |                                        |                                        |
|    | <b><i>Nanorana yunnanensis</i></b>   | <b><i>Nanorana yunnanensis</i></b>     |                                        |
|    |                                      | <i>Odorrana bolavensis</i>             |                                        |
|    | <i>Odorrana yentuensis</i>           |                                        |                                        |
|    | <i>Oreolalax sterlingae</i>          |                                        |                                        |
|    |                                      |                                        | <i>Philautus cardamonus</i>            |
|    | <i>Philautus catbaensis</i>          |                                        |                                        |
|    | <i>Rhacophorus calcaneus</i>         |                                        |                                        |
|    | <i>Rhacophorus helenae</i>           |                                        |                                        |
|    | <i>Rhacophorus vampyrus</i>          |                                        |                                        |
|    | <i>Theloderma nebulosum</i>          |                                        |                                        |
|    | <i>Theloderma palliatum</i>          |                                        |                                        |
|    | <i>Theloderma ryabovi</i>            |                                        |                                        |
|    | <i>Tylototriton hainanensis</i>      |                                        |                                        |
|    | <i>Tylototriton yangi</i>            |                                        |                                        |
| VU | <i>Amolops splendissimus</i>         |                                        |                                        |
|    | <b><i>Amolops vitreus</i></b>        | <b><i>Amolops vitreus</i></b>          |                                        |
|    | <i>Bombina microdeladigitora</i>     |                                        |                                        |
|    |                                      |                                        | <i>Feihyla samkosensis</i>             |
|    | <b><i>Gracixalus quyeti</i></b>      | <b><i>Gracixalus quyeti</i></b>        |                                        |
|    | <i>Kalophrynus honbaensis</i>        |                                        |                                        |
|    | <b><i>Kurixalus motokawai</i></b>    | <b><i>Kurixalus motokawai</i></b>      |                                        |
|    | <i>Leptobrachella bourreti</i>       |                                        |                                        |
|    | <b><i>Leptobrachella isos</i></b>    | <b><i>Leptobrachella isos</i></b>      | <b><i>Leptobrachella isos</i></b>      |
|    | <i>Leptobrachium guangxiense</i>     |                                        |                                        |
|    | <i>Leptobrachium leucops</i>         |                                        |                                        |
|    |                                      | <i>Limnonectes isanensis</i>           |                                        |
|    |                                      | <b><i>Limnonectes lauhachindai</i></b> | <b><i>Limnonectes lauhachindai</i></b> |
|    |                                      |                                        | <i>Limnonectes megastomias</i>         |
|    | <i>Limnonectes quangninhensis</i>    |                                        |                                        |
|    |                                      |                                        | <i>Megophrys auralensis</i>            |

|                                         |                                         |                          |
|-----------------------------------------|-----------------------------------------|--------------------------|
| <i>Megophrys synoria</i>                |                                         | <i>Megophrys synoria</i> |
| <i>Microhyla pineticola</i>             |                                         |                          |
| <i>Nanohyla annamensis</i>              |                                         |                          |
| <i>Nanohyla arboricola</i>              |                                         |                          |
| <b><i>Nanorana unculuanus</i></b>       | <b><i>Nanorana unculuanus</i></b>       |                          |
| <i>Odorrana geminata</i>                |                                         |                          |
| <i>Odorrana grahami</i>                 |                                         |                          |
| <b><i>Odorrana jingdongensis</i></b>    | <b><i>Odorrana jingdongensis</i></b>    |                          |
| <i>Odorrana lipuensis</i>               |                                         |                          |
| <i>Paramesotriton guangxiensis</i>      |                                         |                          |
| <i>Quasipaa acanthophora</i>            |                                         |                          |
| <b><i>Quasipaa spinosa</i></b>          | <b><i>Quasipaa spinosa</i></b>          |                          |
| <i>Raorchestes gryllus</i>              |                                         |                          |
| <i>Rhacophorus marmoridorsum</i>        |                                         |                          |
|                                         | <i>Rhacophorus spelaeus</i>             |                          |
| <i>Rhacophorus vanbanicus</i>           |                                         |                          |
|                                         |                                         | <i>Sylvirana faber</i>   |
| <b><i>Theloderma auratum</i></b>        | <b><i>Theloderma auratum</i></b>        |                          |
| <b><i>Theloderma petilum</i></b>        | <b><i>Theloderma petilum</i></b>        |                          |
| <b><i>Tylototriton notialis</i></b>     | <b><i>Tylototriton notialis</i></b>     |                          |
|                                         | <i>Tylototriton panhai</i>              |                          |
| <i>Tylototriton vietnamensis</i>        |                                         |                          |
| <i>Tylototriton zieglerei</i>           |                                         |                          |
| <b><i>Zhangixalus dorsovireidis</i></b> | <b><i>Zhangixalus dorsovireidis</i></b> |                          |
| <i>Zhangixalus duboisi</i>              |                                         |                          |

**Table S3.** List of the amphibian species of Vietnam with their IUCN red list status

(https://www.iucnredlist.org/; accessed on 22 January 2023).

| Scientific Name                     | IUCN Red List Status       | Family         | Order       |
|-------------------------------------|----------------------------|----------------|-------------|
| <i>Amolops cucae</i>                | Endangered (EN)            | Ranidae        | Anura       |
| <i>Amolops iriodes</i>              | Data Deficient (DD)        | Ranidae        | Anura       |
| <i>Amolops minutus</i>              | Endangered (EN)            | Ranidae        | Anura       |
| <i>Amolops ottozum</i>              | Endangered (EN)            | Ranidae        | Anura       |
| <i>Amolops spinapectoralis</i>      | Least Concern (LC)         | Ranidae        | Anura       |
| <i>Amolops splendissimus</i>        | Vulnerable (VU)            | Ranidae        | Anura       |
| <i>Gracixalus ananjevae</i>         | Least Concern (LC)         | Rhacophoridae  | Anura       |
| <i>Gracixalus lumarius</i>          | Endangered (EN)            | Rhacophoridae  | Anura       |
| <i>Gracixalus nonggangensis</i>     | Endangered (EN)            | Rhacophoridae  | Anura       |
| <i>Gracixalus quyeti</i>            | Vulnerable (VU)            | Rhacophoridae  | Anura       |
| <i>Gracixalus sapaensis</i>         | Endangered (EN)            | Rhacophoridae  | Anura       |
| <i>Gracixalus trieng</i>            | Not assessed (NA)          | Rhacophoridae  | Anura       |
| <i>Gracixalus ziegleri</i>          | Not assessed (NA)          | Rhacophoridae  | Anura       |
| <i>Hylarana montivaga</i>           | Endangered (EN)            | Ranidae        | Anura       |
| <i>Ichthyophis catlocensis</i>      | Data Deficient (DD)        | Ichthyophiidae | Gymnophiona |
| <i>Ichthyophis chaloensis</i>       | Data Deficient (DD)        | Ichthyophiidae | Gymnophiona |
| <i>Ichthyophis nguyenorum</i>       | Least Concern (LC)         | Ichthyophiidae | Gymnophiona |
| <i>Kalophrynus cryptophonus</i>     | Endangered (EN)            | Microhylidae   | Anura       |
| <i>Kalophrynus honbaensis</i>       | Vulnerable (VU)            | Microhylidae   | Anura       |
| <i>Kurixalus banaensis</i>          | Least Concern (LC)         | Rhacophoridae  | Anura       |
| <i>Kurixalus gracilloides</i>       | Data Deficient (DD)        | Rhacophoridae  | Anura       |
| <i>Kurixalus motokawai</i>          | Vulnerable (VU)            | Rhacophoridae  | Anura       |
| <i>Kurixalus viridescens</i>        | Endangered (EN)            | Rhacophoridae  | Anura       |
| <i>Leptobranchella applebyi</i>     | Endangered (EN)            | Megophryidae   | Anura       |
| <i>Leptobranchella ardens</i>       | Endangered (EN)            | Megophryidae   | Anura       |
| <i>Leptobranchella bidoupensis</i>  | Endangered (EN)            | Megophryidae   | Anura       |
| <i>Leptobranchella botsfordi</i>    | Critically Endangered (CR) | Megophryidae   | Anura       |
| <i>Leptobranchella bourreti</i>     | Vulnerable (VU)            | Megophryidae   | Anura       |
| <i>Leptobranchella crocea</i>       | Data Deficient (DD)        | Megophryidae   | Anura       |
| <i>Leptobranchella firthi</i>       | Endangered (EN)            | Megophryidae   | Anura       |
| <i>Leptobranchella graminicola</i>  | Not assessed (NA)          | Megophryidae   | Anura       |
| <i>Leptobranchella kalonensis</i>   | Endangered (EN)            | Megophryidae   | Anura       |
| <i>Leptobranchella macrops</i>      | Endangered (EN)            | Megophryidae   | Anura       |
| <i>Leptobranchella maculosa</i>     | Endangered (EN)            | Megophryidae   | Anura       |
| <i>Leptobranchella nahangensis</i>  | Data Deficient (DD)        | Megophryidae   | Anura       |
| <i>Leptobranchella namdongensis</i> | Endangered (EN)            | Megophryidae   | Anura       |
| <i>Leptobranchella nyx</i>          | Data Deficient (DD)        | Megophryidae   | Anura       |

|                                   |                            |                |       |
|-----------------------------------|----------------------------|----------------|-------|
| <i>Leptobrachella pallida</i>     | Endangered (EN)            | Megophryidae   | Anura |
| <i>Leptobrachella petrops</i>     | Near Threatened (NT)       | Megophryidae   | Anura |
| <i>Leptobrachella pluvialis</i>   | Endangered (EN)            | Megophryidae   | Anura |
| <i>Leptobrachella pyrrhops</i>    | Endangered (EN)            | Megophryidae   | Anura |
| <i>Leptobrachella rowleyae</i>    | Critically Endangered (CR) | Megophryidae   | Anura |
| <i>Leptobrachella tadungensis</i> | Endangered (EN)            | Megophryidae   | Anura |
| <i>Leptobrachella tuberosa</i>    | Least Concern (LC)         | Megophryidae   | Anura |
| <i>Leptobrachium ailaonicum</i>   | Least Concern (LC)         | Megophryidae   | Anura |
| <i>Leptobrachium leucops</i>      | Vulnerable (VU)            | Megophryidae   | Anura |
| <i>Leptobrachium ngoclinhense</i> | Endangered (EN)            | Megophryidae   | Anura |
| <i>Leptobrachium pullum</i>       | Least Concern (LC)         | Megophryidae   | Anura |
| <i>Leptobrachium xanthospilum</i> | Endangered (EN)            | Megophryidae   | Anura |
| <i>Limnonectes kiziriani</i>      | Least Concern (LC)         | Dicroglossidae | Anura |
| <i>Limnonectes nguyenorum</i>     | Near Threatened (NT)       | Dicroglossidae | Anura |
| <i>Limnonectes phuyenensis</i>    | Not assessed (NA)          | Dicroglossidae | Anura |
| <i>Limnonectes quangninhensis</i> | Vulnerable (VU)            | Dicroglossidae | Anura |
| <i>Liuixalus calcarius</i>        | Endangered (EN)            | Rhacophoridae  | Anura |
| <i>Liuixalus catbaensis</i>       | Not assessed (NA)          | Rhacophoridae  | Anura |
| <i>Megophrys caobangensis</i>     | Data Deficient (DD)        | Megophryidae   | Anura |
| <i>Megophrys fansipanensis</i>    | Endangered (EN)            | Megophryidae   | Anura |
| <i>Megophrys frigida</i>          | Not assessed (NA)          | Megophryidae   | Anura |
| <i>Megophrys gerti</i>            | Endangered (EN)            | Megophryidae   | Anura |
| <i>Megophrys hoanglienensis</i>   | Endangered (EN)            | Megophryidae   | Anura |
| <i>Microhyla aurantiventris</i>   | Data Deficient (DD)        | Microhylidae   | Anura |
| <i>Microhyla darevskii</i>        | Data Deficient (DD)        | Microhylidae   | Anura |
| <i>Microhyla hongiaoensis</i>     | Not assessed (NA)          | Microhylidae   | Anura |
| <i>Microhyla minuta</i>           | Data Deficient (DD)        | Microhylidae   | Anura |
| <i>Microhyla neglecta</i>         | Not assessed (NA)          | Microhylidae   | Anura |
| <i>Microhyla ninhthuanensis</i>   | Not assessed (NA)          | Microhylidae   | Anura |
| <i>Microhyla picta</i>            | Data Deficient (DD)        | Microhylidae   | Anura |
| <i>Microhyla pineticola</i>       | Vulnerable (VU)            | Microhylidae   | Anura |
| <i>Microhyla pulverata</i>        | Data Deficient (DD)        | Microhylidae   | Anura |
| <i>Microhyla xodangorum</i>       | Not assessed (NA)          | Microhylidae   | Anura |
| <i>Micryletta erythropoda</i>     | Least Concern (LC)         | Microhylidae   | Anura |
| <i>Micryletta melanops</i>        | Not assessed (NA)          | Microhylidae   | Anura |
| <i>Micryletta nigromaculata</i>   | Endangered (EN)            | Microhylidae   | Anura |
| <i>Nanohyla annamensis</i>        | Vulnerable (VU)            | Microhylidae   | Anura |
| <i>Nanohyla arboricola</i>        | Vulnerable (VU)            | Microhylidae   | Anura |
| <i>Nanohyla nanapollexa</i>       | Data Deficient (DD)        | Microhylidae   | Anura |
| <i>Nanohyla pulchella</i>         | Endangered (EN)            | Microhylidae   | Anura |
| <i>Odorrana banaorum</i>          | Least Concern (LC)         | Ranidae        | Anura |
| <i>Odorrana gigatympana</i>       | Least Concern (LC)         | Ranidae        | Anura |
| <i>Odorrana morafkai</i>          | Least Concern (LC)         | Ranidae        | Anura |

|                                    |                      |                |         |
|------------------------------------|----------------------|----------------|---------|
| <i>Odorrana mutschmanni</i>        | Data Deficient (DD)  | Ranidae        | Anura   |
| <i>Odorrana trankieni</i>          | Near Threatened (NT) | Ranidae        | Anura   |
| <i>Odorrana yentuensis</i>         | Endangered (EN)      | Ranidae        | Anura   |
| <i>Ophryophryne elfina</i>         | Least Concern (LC)   | Ranidae        | Anura   |
| <i>Oreolalax sterlingae</i>        | Endangered (EN)      | Megophryidae   | Anura   |
| <i>Paramesotriton deloustali</i>   | Least Concern (LC)   | Megophryidae   | Anura   |
| <i>Philautus abditus</i>           | Least Concern (LC)   | Salamandridae  | Caudata |
| <i>Philautus catbaensis</i>        | Endangered (EN)      | Rhacophoridae  | Anura   |
| <i>Philautus maosonensis</i>       | Data Deficient (DD)  | Rhacophoridae  | Anura   |
| <i>Quasipaa acanthophora</i>       | Vulnerable (VU)      | Dicroglossidae | Anura   |
| <i>Quasipaa delacouri</i>          | Least Concern (LC)   | Dicroglossidae | Anura   |
| <i>Quasipaa verrucospinosa</i>     | Least Concern (LC)   | Dicroglossidae | Anura   |
| <i>Raorchestes gryllus</i>         | Vulnerable (VU)      | Rhacophoridae  | Anura   |
| <i>Rhacophorus annamensis</i>      | Least Concern (LC)   | Rhacophoridae  | Anura   |
| <i>Rhacophorus calcaneus</i>       | Endangered (EN)      | Rhacophoridae  | Anura   |
| <i>Rhacophorus helenae</i>         | Endangered (EN)      | Rhacophoridae  | Anura   |
| <i>Rhacophorus hoabinhensis</i>    | Data Deficient (DD)  | Rhacophoridae  | Anura   |
| <i>Rhacophorus hoanglienensis</i>  | Least Concern (LC)   | Rhacophoridae  | Anura   |
| <i>Rhacophorus larissae</i>        | Data Deficient (DD)  | Rhacophoridae  | Anura   |
| <i>Rhacophorus marmoridorsum</i>   | Vulnerable (VU)      | Rhacophoridae  | Anura   |
| <i>Rhacophorus robertingeri</i>    | Least Concern (LC)   | Rhacophoridae  | Anura   |
| <i>Rhacophorus vampyrus</i>        | Endangered (EN)      | Rhacophoridae  | Anura   |
| <i>Rhacophorus vanbanicus</i>      | Vulnerable (VU)      | Rhacophoridae  | Anura   |
| <i>Rhacophorus viridimaculatus</i> | Data Deficient (DD)  | Rhacophoridae  | Anura   |
| <i>Theloderma annae</i>            | Data Deficient (DD)  | Rhacophoridae  | Anura   |
| <i>Theloderma auratum</i>          | Vulnerable (VU)      | Rhacophoridae  | Anura   |
| <i>Theloderma laeve</i>            | Least Concern (LC)   | Rhacophoridae  | Anura   |
| <i>Theloderma lateriticum</i>      | Least Concern (LC)   | Rhacophoridae  | Anura   |
| <i>Theloderma nebulosum</i>        | Endangered (EN)      | Rhacophoridae  | Anura   |
| <i>Theloderma palliatum</i>        | Endangered (EN)      | Rhacophoridae  | Anura   |
| <i>Theloderma ryabovi</i>          | Endangered (EN)      | Rhacophoridae  | Anura   |
| <i>Theloderma truongsongense</i>   | Least Concern (LC)   | Rhacophoridae  | Anura   |
| <i>Theloderma khoii</i>            | Not assessed (NA)    | Rhacophoridae  | Anura   |
| <i>Tylototriton pasmansii</i>      | Data Deficient (DD)  | Salamandridae  | Caudata |
| <i>Tylototriton sparreboomi</i>    | Data Deficient (DD)  | Salamandridae  | Caudata |
| <i>Tylototriton thaiorum</i>       | Not assessed (NA)    | Salamandridae  | Caudata |
| <i>Tylototriton vietnamensis</i>   | Vulnerable (VU)      | Salamandridae  | Caudata |
| <i>Tylototriton ziegleri</i>       | Vulnerable (VU)      | Salamandridae  | Caudata |
| <i>Vietnamophryne cuongi</i>       | Not assessed (NA)    | Microhylidae   | Anura   |
| <i>Vietnamophryne inexpectata</i>  | Data Deficient (DD)  | Microhylidae   | Anura   |
| <i>Vietnamophryne orlovi</i>       | Data Deficient (DD)  | Microhylidae   | Anura   |
| <i>Vietnamophryne vuquangensis</i> | Not assessed (NA)    | Microhylidae   | Anura   |
| <i>Xenophrys truongsongensis</i>   | Not assessed (NA)    | Megophryidae   | Anura   |
| <i>Zhangixalus franki</i>          | Not assessed (NA)    | Rhacophoridae  | Anura   |

*Zhangixalus jodiae*

Not assessed (NA)

Rhacophoridae

Anura

---

**Table S4.** Proportion of Data Deficient (DD) and Not Assessed (NA) species on the total endemic species in different world areas. Each world area is presented as follow:

Neotropics (Brazil, Perú, Ecuador, Bolivia, Chile, Colombia, Venezuela, Argentina);

Central America (Mexico, Guatemala, Honduras, Panama, Costa Rica, Cuba); East Africa

(Kenya, Tanzania); Asia (China, India, Japan); Southeast Asia (Cambodia, Indonesia, Laos,

Malaysia, Myanmar, Thailand, Vietnam).

| World area      | DD/ASS | DD+NA/TOT | NA/TOT |
|-----------------|--------|-----------|--------|
| Neotropics      | 0.121  | 0.206     | 0.097  |
| Central America | 0.080  | 0.140     | 0.067  |
| East Africa     | 0.198  | 0.243     | 0.058  |
| Madagascar      | 0.014  | 0.111     | 0.099  |
| Southeast Asia  | 0.306  | 0.535     | 0.342  |
| Australia       | 0.049  | 0.148     | 0.105  |
| Usa             | 0.071  | 0.245     | 0.187  |
| Asia            | 0.102  | 0.423     | 0.356  |

**Table S5.** Data Deficient (DD) and not assessed (NA) species endemic and subendemic to Vietnam. For each species, the status (endemic or subendemic), the number of known locations, the range extension (i.e., the type and the extension of the locations), and the range description are reported (IUCN 2022). The range extension is classified as “small” if the locations are smaller than 1000 km<sup>2</sup>, whereas it is classified as “medium” if the polygon representing the species’ range is smaller than 5000 km<sup>2</sup>, and it is classified as “large” if the polygon is larger than 5000 km<sup>2</sup>.

| Species                        | Risk Category | Status                | N locations | Range extension | Range description                                                                                                                                                                                                                                                                                                                                                                                                                                                                                                                                                  |
|--------------------------------|---------------|-----------------------|-------------|-----------------|--------------------------------------------------------------------------------------------------------------------------------------------------------------------------------------------------------------------------------------------------------------------------------------------------------------------------------------------------------------------------------------------------------------------------------------------------------------------------------------------------------------------------------------------------------------------|
| <i>Amolops iriodes</i>         | DD            | Subendemic (China)    | 1           | small           | This species is currently known only from Mount Tay Con Linh, Cao Bo Commune, Vi Xuyen District, Ha Giang Province, northeastern Viet Nam between 1,400 and 1,700 m asl (Bain and Nguyen 2004a). This is unlikely to represent the actual limits of the species’ range; similar habitat and elevations to those in its known localities occur in several adjacent areas including southern Yunnan Province, China. Further surveys in these areas may uncover the species’ presence, and they have been included in the range map associated with this assessment. |
| <i>Ichthyophis catlocensis</i> | DD            | Subendemic (Cambodia) | 1           | small           | This species is known only from a single locality at 135 m asl in Cat Tien National Park, Lam Dong Province, southern-central Viet Nam (Geissler et al. 2014). This is unlikely to represent the actual limits of the species' range; similar habitat to that in its known locality occurs in adjacent lowland parts of Dak Nong, Binh Phuoc, Dong Nai, Binh Thuan and Ba Ria - Vung Tau Provinces, Viet Nam, as well as Mondolkiri and Kratie Provinces, Cambodia. Further surveys in these areas may uncover its presence there.                                 |
| <i>Ichthyophis chaloensis</i>  | DD            | Subendemic (Laos)     | 1           | medium          | This species is known only from a single locality at approximately 621 m asl in an extension of Phong Nha - Ke Bang National Park, Quang Binh Province, central Viet Nam (Geissler et al. 2014). This is unlikely to represent the actual limits of the species' range; similar habitat and elevations to those in its known locality occur in adjacent parts of Ha Tinh, Quang Tri, Thua Thien-Hue and Quang Nam Provinces, Viet Nam, as well as                                                                                                                  |

|                                   |    |            |   |        |                                                                                                                                                                                                                                                                                                                                                                                                                                                                                                                                                                                                                                                                                                                                                                                                                                                                                                                                                                                                                                     |
|-----------------------------------|----|------------|---|--------|-------------------------------------------------------------------------------------------------------------------------------------------------------------------------------------------------------------------------------------------------------------------------------------------------------------------------------------------------------------------------------------------------------------------------------------------------------------------------------------------------------------------------------------------------------------------------------------------------------------------------------------------------------------------------------------------------------------------------------------------------------------------------------------------------------------------------------------------------------------------------------------------------------------------------------------------------------------------------------------------------------------------------------------|
|                                   |    |            |   |        | Khammouan, Savannakhet, Salavan and Xekong Provinces, Lao People's Democratic Republic. Further surveys in these areas may uncover its presence there, and they have been included in the range map associated with this assessment.                                                                                                                                                                                                                                                                                                                                                                                                                                                                                                                                                                                                                                                                                                                                                                                                |
| <i>Kurixalus gracilloides</i>     | DD | Endemic    | 1 | small  | This species is known from 145 m asl at a single locality in Pu Mat National Park, Nghe An Province, northern Viet Nam (Nguyen et al. 2020c). This is unlikely to represent the actual limits of this species' range; habitat and elevations similar to those at its known locality occur in adjacent areas. Further surveys may reveal the species' presence in these areas and they have been included in the range map associated with this assessment as potential range.                                                                                                                                                                                                                                                                                                                                                                                                                                                                                                                                                       |
| <i>Leptobrachella crocea</i>      | DD | Endemic    | 1 | small  | This species is currently known only from a single site at 1,316 m asl in Ngoc Linh Nature Reserve, Dak Glei District, Kon Tum Province, Viet Nam (Rowley et al. 2010). This is unlikely to represent the true limits of its range as adjacent forested areas are contiguous with the species' known locality and its presence is expected northward in southern Song Thanh Nature Reserve as well as westward near the Lao border, outside of either protected area. Therefore, further surveys are needed to confirm this and may possibly detect the species even further afield. However, as most congeners do not occupy very expansive ranges, the true range of this species is not expected to occupy all the available suitable habitat. Pending confirmation of its true range, it has been mapped to the forested area between 1,000–1,600 m asl that immediately surrounds the type locality. As such, its estimated extent of occurrence (EOO) is 135 km <sup>2</sup> and represents only one threat-defined location. |
| <i>Leptobrachella nahangensis</i> | DD | Endemic    | 1 | small  | This species is currently known only from a single locality at 314 m asl in Ha Nang Nature Reserve, Tuyen Quang Province, northern Viet Nam (Lathrop et al. 1998). Similar habitat and elevations to those in its known locality extend into adjacent parts of Ha Giang, Cao Bang and Bac Kan Provinces. Further surveys may uncover its presence in these areas, therefore its range has been projected beyond known sites to include these areas of suitable habitat.                                                                                                                                                                                                                                                                                                                                                                                                                                                                                                                                                             |
| <i>Leptobrachella nyx</i>         | DD | Subendemic | 3 | medium | This species is known only from 800–1,700 m asl in Cao Bo Commune, Vi Xuyen District, Ha Giang Province, Viet Nam (Ohler et al. 2011). Similar habitat and elevations to those in its known locality occur in adjacent parts of northeastern Ha Giang. Further surveys in these areas may                                                                                                                                                                                                                                                                                                                                                                                                                                                                                                                                                                                                                                                                                                                                           |

|                                 |    |            |   |        |                                                                                                                                                                                                                                                                                                                                                                                                                                                                                                                                                                                                                                                                                                                       |
|---------------------------------|----|------------|---|--------|-----------------------------------------------------------------------------------------------------------------------------------------------------------------------------------------------------------------------------------------------------------------------------------------------------------------------------------------------------------------------------------------------------------------------------------------------------------------------------------------------------------------------------------------------------------------------------------------------------------------------------------------------------------------------------------------------------------------------|
|                                 |    |            |   |        | uncover its presence there. Although a small part of southeastern Yunnan Province, China contains connected and similar habitat, the species' presence there is unclear as there are no records of it from China. The species' estimated extent of occurrence (EOO) is 2,096 km <sup>2</sup> , which consists of five or fewer threat-defined location.                                                                                                                                                                                                                                                                                                                                                               |
| <i>Megophrys caobangensis</i>   | DD | Subendemic | 1 | small  | This species is only known from Phia Oac-Phia Den National Park, Nguyen Binh District in Cao Bang Province, northeastern Viet Nam, at 1,252 to 1,518 m asl (Nguyen et al. 2020a). It is expected to occur more widely in northeastern Viet Nam, and possibly could be found in the neighbouring Guangxi Province in China (Nguyen et al. 2020). Its current estimated extent of occurrence (EOO) is 41 km <sup>2</sup> .                                                                                                                                                                                                                                                                                              |
| <i>Microhyla aurantiventris</i> | DD | Endemic    | 1 | small  | This species is only known from Tram Lap Forest in Gia Lai Province, Viet Nam, on part of the Kon Tum Plateau, at elevations between 1,190-1,210 m asl (Nguyen et al. 2019). This may not represent the actual limits of this species' range; contiguous and similar habitat and elevations occur in adjacent parts of the plateau, to which the species is thought to be endemic, and further surveys will likely reveal its presence there (Nguyen et al. 2019). These areas have been included in the range map associated with this assessment as potential range. The species' estimated extent of occurrence (EOO) is 142 km <sup>2</sup> .                                                                     |
| <i>Microhyla darevskii</i>      | DD | Subendemic | 1 | medium | This species is known only from the central Annamite Mountains in Kon Tum Province, Viet Nam, at 1,500 m asl (Poyarkov et al. 2014). Similar habitat and elevations to those in its known locality occur in adjacent parts of southern Quang Nam and northeastern Gia Lai Province, further surveys in these areas may uncover its presence there (Poyarkov et al. 2014). For the same reason, the species may occur in south-eastern Xekong and north-eastern Attapu Provinces, Lao People's Democratic Republic (Poyarkov et al. 2014). These areas have been mapped as potential range. The species' extent of occurrence (EOO) is 1,156 km <sup>2</sup> , and its range consists of two threat-defined locations. |
| <i>Microhyla minuta</i>         | DD | Endemic    | 1 | small  | This species is known with certainty only from 157 m asl in Cat Tien National Park, Dong Nai Province, southern Viet Nam (Poyarkov et al. 2014). Similar habitat to that in its known locality occurs in adjacent lowland parts of Lam Dong, Binh Phuoc, Dak Nong, and Binh Thuan Provinces; further surveys in these areas may uncover its presence there (Poyarkov et al. 2014).                                                                                                                                                                                                                                                                                                                                    |

|                              |    |            |   |        |                                                                                                                                                                                                                                                                                                                                                                                                                                                                                                                                                                                                                                                                                                                                                                                                                  |
|------------------------------|----|------------|---|--------|------------------------------------------------------------------------------------------------------------------------------------------------------------------------------------------------------------------------------------------------------------------------------------------------------------------------------------------------------------------------------------------------------------------------------------------------------------------------------------------------------------------------------------------------------------------------------------------------------------------------------------------------------------------------------------------------------------------------------------------------------------------------------------------------------------------|
|                              |    |            |   |        | For the same reason, the species' range potentially extends into eastern Binh Duong Province (Poyarkov et al. 2014). A record of <i>Microhyla</i> from Vinh Cuu Nature Reserve, Dong Nai Province (Tarkhnishvili 1994) is expected to also be assignable to <i>Microhyla minuta</i> (Poyarkov et al. 2014).                                                                                                                                                                                                                                                                                                                                                                                                                                                                                                      |
| <i>Microhyla picta</i>       | DD | Endemic    | 2 | small  | Nothing is known about this species' distribution except that it was described from somewhere in southern Viet Nam (Schenkel 1901). Bourret (1942) reported the species from both Vung Tau Province and somewhere in Central Viet Nam, but there is only one recorded specimen of this species and it is unclear how accurate these localities are.                                                                                                                                                                                                                                                                                                                                                                                                                                                              |
| <i>Microhyla pulverata</i>   | DD | Endemic    | 1 | small  | This species is known only from the type locality at 700-750m asl on the Tay Nguyen Plateau, from near Buon Luoi village, 20km north-west of Kannack, in An Khe District, Gia Lai Province, Viet Nam. The limits of its distribution remain unknown.                                                                                                                                                                                                                                                                                                                                                                                                                                                                                                                                                             |
| <i>Nanohyla nanapollexa</i>  | DD | Subendemic | 2 | medium | This species is known only from Ngoc Linh Mountain, Quang Nam Province, and Kon Plong District, Kon Tum Province in central Viet Nam, at 1,480 m asl (Bain and Nguyen 2004b, Gorin et al. 2020). Similar habitat and elevations to those in its known locality occur in adjacent areas in southeastern Lao People's Democratic Republic (Laos PDR); further surveys in these areas may uncover its presence there, and they have been mapped as potential range. A record exists at 350-400 m asl further south in Phu Yen Province (Do et al. 2017), however, there is a morphological difference between this and the topotypic population (Do et al. 2017, L. Nguyen unpubl. data), and molecular confirmation of the identity of the Phu Yen population is recommended (L. Nguyen pers. comm. October 2020). |
| <i>Odorrana mutschmanni</i>  | DD | Subendemic | 1 | small  | This species is currently known only from Ha Lang District, Cao Bang Province in northeastern Viet Nam, at elevations around 447 m asl (Pham et al. 2016). This is unlikely to represent the actual limits of the species' range; similar habitat and elevations to those in its known locality occur in adjacent parts of Ha Giang Province, Viet Nam, and Guangxi and Yunnan provinces, China. Further surveys in these areas are likely to uncover its presence there.                                                                                                                                                                                                                                                                                                                                        |
| <i>Philautus maosonensis</i> | DD | Subendemic | 1 | large  | This species is currently known from 900–1,700 m asl in Lang Son, Vinh Phu and Ha Giang provinces, northern Viet Nam (Bourret 1937, Inger et al. 1999, Bossuyt and Dubois 2001, Bain                                                                                                                                                                                                                                                                                                                                                                                                                                                                                                                                                                                                                             |

|                                    |    |            |   |        |                                                                                                                                                                                                                                                                                                                                                                                                                                                                                                                                                                                                                      |
|------------------------------------|----|------------|---|--------|----------------------------------------------------------------------------------------------------------------------------------------------------------------------------------------------------------------------------------------------------------------------------------------------------------------------------------------------------------------------------------------------------------------------------------------------------------------------------------------------------------------------------------------------------------------------------------------------------------------------|
|                                    |    |            |   |        | and Nguyen 2004a). These are unlikely to represent the actual limits of the species' range. Similar habitat and elevations to those in known localities occur in adjacent areas including small parts of Guangxi and Yunnan Provinces, southern China. Further surveys in these areas may uncover the species' presence, and they have been included in the range map associated with this assessment.                                                                                                                                                                                                               |
| <i>Rhacophorus hoabinhensis</i>    | DD | Endemic    | 1 | small  | This species is only known from Hang Kia-Pa Co Nature Reserve in Hoa Binh Province, northern Viet Nam, and its currently known elevation range is 1,230-1,350 m asl (Nguyen et al. 2017). This is unlikely to represent the actual limits of this species' range; habitat and elevations similar to those at its known locality occur in adjacent and intervening areas. Further surveys may reveal the species' presence in these areas and they have been included in the range map associated with this assessment as potential range. The species' estimated extent of occurrence (EOO) is 136 km <sup>2</sup> . |
| <i>Rhacophorus larissae</i>        | DD | Subendemic | 1 | small  | This species is known only from 1,400 m asl within Nguyen Binh District, Cao Bang Province, Viet Nam (Ostroshabov et al. 2013), including part of Pia Oac - Phia Den Nature Reserve (Truong Nguyen pers. comm. August 2016). This is unlikely to represent the actual limits of the species' range; similar habitat to that in its known locality occurs in adjacent high-elevation areas including a small section of extreme south-western Guangxi Province, China. Further surveys in these areas may uncover its presence there, and they have been included in the species' projected range.                    |
| <i>Rhacophorus viridimaculatus</i> | DD | Subendemic | 1 | small  | This species is known only from 600–1,300 m asl on Muong Cha Mountain, Ha Giang Province and in Na Hang Nature Reserve, Tuyen Quang Province, Viet Nam (Ostroshabov et al. 2013). These are unlikely to represent the actual limits of the species' range; similar habitat to that in its known localities occurs in adjacent high-elevation parts of Bac Can and Cao Bang provinces, as well as a small part of southeastern Yunnan Province, China. Further surveys in these areas may uncover its presence there, and its range has been projected to include these areas.                                        |
| <i>Theioderma annae</i>            | DD | Endemic    | 1 | medium | This species is known from Ngoc Son-Ngo Luong Nature Reserve, Hoa Binh Province, as well as Trang An Landscape Complex and Cuc Phuong National Park, Ninh Binh Province, Viet Nam, at elevations between 67-650 m asl (Nguyen et al.                                                                                                                                                                                                                                                                                                                                                                                 |

|                                   |    |         |   |       |                                                                                                                                                                                                                                                                                                                                                                                                                                                                                                                                                                                                                                                                                                                                                                                                                                                                                                                                                                                                                                                                                                                                                                                                                                                          |
|-----------------------------------|----|---------|---|-------|----------------------------------------------------------------------------------------------------------------------------------------------------------------------------------------------------------------------------------------------------------------------------------------------------------------------------------------------------------------------------------------------------------------------------------------------------------------------------------------------------------------------------------------------------------------------------------------------------------------------------------------------------------------------------------------------------------------------------------------------------------------------------------------------------------------------------------------------------------------------------------------------------------------------------------------------------------------------------------------------------------------------------------------------------------------------------------------------------------------------------------------------------------------------------------------------------------------------------------------------------------|
|                                   |    |         |   |       | 2016, Nguyen and Luu 2018). This may not represent the limits of the species' range; similar habitat and elevations to those in its known localities occur in adjacent areas in these two provinces, and they have been included as potential range in the map associated with this assessment. Further surveys in these areas may uncover its presence there, although recent efforts have so far not yielded more discoveries, suggesting this species may possibly be endemic to the limestone karst forest region wherein its range lies (T. Ziegler pers. comm. August 2020).                                                                                                                                                                                                                                                                                                                                                                                                                                                                                                                                                                                                                                                                       |
| <i>Tylototriton pasmansi</i>      | DD | Endemic | 1 | large | This species is known from northern Viet Nam at elevations between 720 - 1,090 m asl (Bernardes et al. 2020). Based on preliminary genetic analyses two subspecies are tentatively assigned - <i>Tylototriton pasmansi</i> and <i>Tylototriton pasmansi obsti</i> , with the former occurring on the eastern side of Da River in Hoa Binh and Phu Tho provinces and the latter west of the river in Son La and Thanh Hoa provinces (Bernardes et al. 2020). This may not represent the limits of this species' range; habitat and elevations similar to those at its known localities occur in adjacent and intervening areas. Further surveys may reveal the species' presence in these areas and they have been included in the range map associated with this assessment as potential range. However, it is also possible that the species is endemic to currently known localities (Bernardes et al. 2020). The species was recently split from the <i>T. asperrimus</i> complex resulting now in <i>T. asperrimus sensu stricto</i> being limited to a more restricted geographic range that is not contiguous to that of <i>T. pasmansi</i> (Bernardes et al. 2020). The species' estimated extent of occurrence (EOO) is 31,636 km <sup>2</sup> . |
| <i>Tylototriton sparreboomi</i>   | DD | Endemic | 1 | small | This species is known from a single locality in Sin Ho District, Lai Chau Province, Viet Nam, at approximately 1,670 m asl (Bernardes et al. 2020). This may not represent the actual limits of this species' range; habitat and elevations similar to those at its known locality occur in adjacent areas, and further surveys may reveal the species' presence in these areas.                                                                                                                                                                                                                                                                                                                                                                                                                                                                                                                                                                                                                                                                                                                                                                                                                                                                         |
| <i>Vietnamophryne inexpectata</i> | DD | Endemic | 1 | small | This species is only known from a single locality in Kon Chu Rang Nature Reserve in Gia Lai Province, central Viet Nam, at 1,000 m asl (Poyarkov et al. 2018). This is unlikely to represent the actual limits of this species' range; habitat and elevations similar to those at its                                                                                                                                                                                                                                                                                                                                                                                                                                                                                                                                                                                                                                                                                                                                                                                                                                                                                                                                                                    |

|                                   |    |         |   |       |                                                                                                                                                                                                                                                                                                                                                                                                                                                                                                                                                                                                                                                                                       |
|-----------------------------------|----|---------|---|-------|---------------------------------------------------------------------------------------------------------------------------------------------------------------------------------------------------------------------------------------------------------------------------------------------------------------------------------------------------------------------------------------------------------------------------------------------------------------------------------------------------------------------------------------------------------------------------------------------------------------------------------------------------------------------------------------|
|                                   |    |         |   |       | known locality occur in adjacent and intervening areas. Further surveys may reveal the species' presence in these areas and they have been included in the range map associated with this assessment as potential range.                                                                                                                                                                                                                                                                                                                                                                                                                                                              |
| <i>Vietnamophryne orlovi</i>      | DD | Endemic | 1 | small | This species is only known from a single locality on Phia Oac Mountain, Phia Oac-Phia Den National Park in Cao Bang Province, northern Viet Nam, at 1,200 m asl (Poyarkov et al. 2018). This is unlikely to represent the actual limits of this species' range; habitat and elevations similar to those at its known locality occur in adjacent and intervening areas. Further surveys may reveal the species' presence in these areas and they have been included in the range map associated with this assessment as potential range.                                                                                                                                               |
| <i>Gracixalus trieng</i>          | NA | Endemic | 1 | small | The new species is known only from between 1716–2055 m asl within Ngoc Linh Nature Reserve, Kon Tum Province, Vietnam. Mount Ngoc Linh and adjacent high-elevation peaks form an isolated area of high elevation and many faunal elements at this location are thought to be endemic (Abramov et al. 2006, Jenkins et al. 2007). Thus, we assume that the new species is restricted geographically, likely having an extent of occurrence (EOO) of <1000 km <sup>2</sup> . <i>Gracixalus trieng</i> sp. nov. therefore likely qualifies as Endangered in accordance with the IUCN Red List of Threatened Species categories and criteria (IUCN 2012) B1ab(iii) (Rowley et al., 2020). |
| <i>Gracixalus zieglerei</i>       | NA | Endemic | 1 | small | Currently, the new species is known only from the evergreen montane tropical forest of Yen Bai Province at an elevation of ca. 2200 m a.s.l. (Le et al., 2021)                                                                                                                                                                                                                                                                                                                                                                                                                                                                                                                        |
| <i>Leptobrachella graminicola</i> | NA | Endemic | 1 | small | This species is only known from the recently designated Bat Xat Nature Reserve on Mount Pu Ta Leng at elevations between 2383 and 2437 m asl. Most species of <i>Leptobrachella</i> are associated with forests and it is likely that they are forest dependent. <i>Leptobrachella graminicola</i> sp. Nov. likely qualifies for being assessed as Data Deficient in accordance with the IUCN Red List of Threatened Species categories and criteria (see IUCN 2012; Nguyen et al., 2021b).                                                                                                                                                                                           |
| <i>Limnonectes phuyenensis</i>    | NA | Endemic | 1 | small | <i>Limnonectes phuyenensis</i> sp. nov. is currently known only from Phu Yen Province, South-central Vietnam (Pham et al., 2020).                                                                                                                                                                                                                                                                                                                                                                                                                                                                                                                                                     |
| <i>Liuixalus catbaensis</i>       | NA | Endemic | 1 | small | Known from the type locality, Ao Ech (Frog Pond) within the Cat Ba National Park, Cat Ba Island, the largest island of the Cat Ba                                                                                                                                                                                                                                                                                                                                                                                                                                                                                                                                                     |

|                                 |    |         |   |       |                                                                                                                                                                                                                                                                                                                                                                                                                                                                                                                       |
|---------------------------------|----|---------|---|-------|-----------------------------------------------------------------------------------------------------------------------------------------------------------------------------------------------------------------------------------------------------------------------------------------------------------------------------------------------------------------------------------------------------------------------------------------------------------------------------------------------------------------------|
|                                 |    |         |   |       | Archipelago in Ha Long Bay, northern Vietnam (Nguyen et al., 2014)                                                                                                                                                                                                                                                                                                                                                                                                                                                    |
| <i>Megophrys frigida</i>        | NA | Endemic | 2 | small | This species is currently only known from the recently designated Bat Xat Nature Reserve on Mount Ky Quan San at elevations between 2118 m asl and 2668 m. The species' EOO is currently predicted to be 832 km <sup>2</sup> . We recommend that <i>Megophrys frigida</i> sp. nov. is listed as Endangered in accordance with the IUCN Red List of Threatened Species categories and criteria B1ab (iii) (see IUCN 2012; Tapley et al., 2021).                                                                        |
| <i>Microhyla hongiaoensis</i>   | NA | Endemic | 1 | small | The new species currently known only from the type locality in Bi Doup-Nui Ba National Park, Lac Duong District, Lam Dong Province, Vietnam (Hoang et al., 2020).                                                                                                                                                                                                                                                                                                                                                     |
| <i>Microhyla neglecta</i>       | NA | Endemic | 3 | small | To date, the new species is known exclusively from three localities within the eastern portion of the Bidoup–Nui Ba National Park in Lam Dong Province, southern Vietnam. <i>Microhyla neglecta</i> was observed at elevations from 1,450 m a.s.l. (in the environs of the Giang Ly ranger station) to 1,800 m a.s.l. (on the northern slope of Mt. Bidoup). All three known localities are located within a narrow area (approximately 20 km <sup>2</sup> ) within the Da Nhim River Valley (Poyarkov et al., 2020). |
| <i>Microhyla ninhthuanensis</i> | NA | Endemic | 1 | small | <i>Microhyla ninhthuanensis</i> sp. nov. is currently only known from the type locality in Phuoc Binh National Park, Ninh Thuan Province, Vietnam. The species was recorded at an elevation of ca. 300 m a.s.l. (Hoang et al., 2021b)                                                                                                                                                                                                                                                                                 |
| <i>Microhyla xodangorum</i>     | NA | Endemic | 1 | small | <i>Microhyla xodangorum</i> sp. nov. is currently only known from the type locality in Kon Tum Plateau, Kon Tum Province, Vietnam. The species was found at an elevation of ca 1250 m a.s.l. Based on its habitat and altitudinal range, the new species is likely endemic to the Central Highlands of Vietnam. However, the extent of its actual distribution range requires further studies (Hoang et al., 2022).                                                                                                   |
| <i>Micryletta melanops</i>      | NA | Endemic | 1 | small | The new species is currently only recorded from the mid-elevation montane evergreen pine forest in its type locality (Poyarkov et al., 2021b).                                                                                                                                                                                                                                                                                                                                                                        |
| <i>Theloderma khoii</i>         | NA | Endemic | 2 | small | The distribution of the new species is unknown but probably extends into adjacent high elevation forested areas in Ha Giang Province, Vietnam and in Yunnan Province, China with an extent of occurrence of only < 1000 km <sup>2</sup> and continuing decline in the quality of its habitat due to deforestation. Thus, we suggest the species                                                                                                                                                                       |

|                                    |    |         |   |       |                                                                                                                                                                                                                                                                                                                                                                                                                                                                                                                                                                                                                                                                                                                                                                                                                                                         |
|------------------------------------|----|---------|---|-------|---------------------------------------------------------------------------------------------------------------------------------------------------------------------------------------------------------------------------------------------------------------------------------------------------------------------------------------------------------------------------------------------------------------------------------------------------------------------------------------------------------------------------------------------------------------------------------------------------------------------------------------------------------------------------------------------------------------------------------------------------------------------------------------------------------------------------------------------------------|
|                                    |    |         |   |       | should be considered Endangered following IUCN's Red List categories (Ninh et al., 2022).                                                                                                                                                                                                                                                                                                                                                                                                                                                                                                                                                                                                                                                                                                                                                               |
| <i>Tylototriton thaiorum</i>       | NA | Endemic | 1 | small | To date, <i>Tylototriton thaiorum</i> sp. nov. is known only from a restricted area in montane forests of Pu Hoat Nature Reserve, Nghe An Province, northern part of Central Vietnam at elevations from 700 to 1000 m a.s.l. This area is located ca. 220 km air distance northwards from the type locality of <i>T. notialis</i> in Khammouan Province of Laos. The Pu Hoat Mountain Range is located on the northeastern edge of Xiangkhouang Plateau; it separates the Nghe An Province of Vietnam from the Houaphan Province of Laos. The locality of the new species is ca. 4 km from the national border of Vietnam and Laos, thus the occurrence of <i>Tylototriton thaiorum</i> sp. nov. is also anticipated on the north-western slopes of Pu Hoat Mountain Range in the adjacent parts of Houaphan Province of Laos (Poyarkov et al., 2021a). |
| <i>Vietnamophryne cuongi</i>       | NA | Endemic | 1 | small | <i>Vietnamophryne cuongi</i> sp. nov. is currently known only from Ba Vi NP, Hanoi, Vietnam. Specimens of the new species were found near a small pond with rotten leaves in evergreen tropical forests of Ba Vi NP on elevations between 975 – 1106 m a.s.l. (Nguyen et al., 2021a).                                                                                                                                                                                                                                                                                                                                                                                                                                                                                                                                                                   |
| <i>Vietnamophryne vuquangensis</i> | NA | Endemic | 1 | small | <i>Vietnamophryne vuquangensis</i> sp. nov. is currently known only from the type locality, Vu Quang NP, Vu Quang District, Ha Tinh Province. Specimens of the new species were found on the soil or under large tree-trunks and under leaf litter in evergreen tropical forests of Vu Quang NP at an elevation of 966 m a.s.l. (Hoang et al., 2021a).                                                                                                                                                                                                                                                                                                                                                                                                                                                                                                  |
| <i>Xenophrys truongsongensis</i>   | NA | Endemic | 1 | small | Currently known only from Thua Thien Hue Province southwards to Lam Dong Province, central Vietnam; expected in the evergreen forests on western side of Truong Son Range in Laos and Cambodia as well. (Luong et al., 2022).                                                                                                                                                                                                                                                                                                                                                                                                                                                                                                                                                                                                                           |
| <i>Zhangixalus franki</i>          | NA | Endemic | 1 | small | <i>Zhangixalus franki</i> sp. nov. is currently known only from the type locality in Ha Giang Province, northern Vietnam. The species was recorded at elevations between 1320 and 1360 m a.s.l. (Ninh et al., 2020).                                                                                                                                                                                                                                                                                                                                                                                                                                                                                                                                                                                                                                    |
| <i>Zhangixalus jodiae</i>          | NA | Endemic | 1 | small | <i>Zhangixalus jodiae</i> sp. nov. is currently known only from the type locality in Ha Giang Province, northeastern Vietnam (Nguyen et al., 2020b).                                                                                                                                                                                                                                                                                                                                                                                                                                                                                                                                                                                                                                                                                                    |

**Table S6.** Log-Linear analysis. Simultaneous test of all k-factor interactions. The improvement in fit when including all 2-way interactions in the model (K-Factor = 2) is highly significant (i.e., the model provides a very poor fit). The improvement in fit when adding all 3-way interactions to the model (K-Factor = 3) is not significant (i.e., the model provides an adequate fit). The least complex model that will fit the observed data should not contain any three-way associations but contains one or more two-way associations. N-Factors numbers represent no interaction (1), 2-way interactions (2), and 3-way interactions (3) among the considered factors (THREAT, AREA, and RISK CAT).

| N-Factors | df | Max.Lik. $\chi^2$ | $p$    | Pearson $\chi^2$ | $p$    |
|-----------|----|-------------------|--------|------------------|--------|
| 1         | 8  | 16320.16          | <0.001 | 20865.96         | <0.001 |
| 2         | 19 | 336.45            | <0.001 | 302.76           | <0.001 |
| 3         | 12 | 14.3              | 0.282  | 15.16            | 0.233  |

**Table S7.** Log-Linear analysis. Tests of all marginal and partial associations.

| EFFECT               | DoF | Prt.Ass. $\chi^2$ . | $p$    | Mrg.Ass. $\chi^2$ . | $p$    |
|----------------------|-----|---------------------|--------|---------------------|--------|
| THREAT               | 4   | 4194.11             | <0.001 | 4194.11             | <0.001 |
| AREA                 | 1   | 10732.48            | <0.001 | 10732.48            | <0.001 |
| RISK CATEGORY        | 3   | 1393.58             | <0.001 | 1393.58             | <0.001 |
| THREAT*AREA          | 4   | 79                  | <0.001 | 85.3                | <0.001 |
| THREAT*RISK CATEGORY | 12  | 171.88              | <0.001 | 178.17              | <0.001 |
| AREA*RISK CATEGORY   | 3   | 72.99               | <0.001 | 79.28               | <0.001 |

**Table S8.** Log-Linear analysis. Marginal tables of two-way associations. Threats are numbered as follows: (1) Urbanization (Residential & commercial development + Pollution), (2) Natural resource use (Agriculture & aquaculture + Biological resource use), (3) Industrial development (Energy production & mining + Transportation & service corridors), (4) Alien species and disease, and (5) Climate change. Data are showed as species frequencies.

| Marginal Table: THREAT by AREA |               |               |               |               |               |           |
|--------------------------------|---------------|---------------|---------------|---------------|---------------|-----------|
|                                | THREAT -<br>1 | THREAT -<br>2 | THREAT -<br>3 | THREAT -<br>4 | THREAT -<br>5 | Tota<br>l |
| WORLD                          | 1993          | 4221          | 846           | 1373          | 701           | 9134      |
| VIETNA<br>M                    | 33            | 164           | 32            | 3             | 13            | 245       |
| Total                          | 2026          | 4385          | 878           | 1376          | 714           | 9379      |

| Marginal Table: THREAT by RISK |               |               |               |               |               |           |
|--------------------------------|---------------|---------------|---------------|---------------|---------------|-----------|
|                                | THREAT -<br>1 | THREAT -<br>2 | THREAT -<br>3 | THREAT -<br>4 | THREAT -<br>5 | Tota<br>l |
| CR                             | 435           | 983           | 172           | 414           | 250           | 2254      |
| EN                             | 812           | 1762          | 383           | 460           | 249           | 3666      |
| VU                             | 562           | 1037          | 235           | 295           | 183           | 2312      |
| DD                             | 217           | 603           | 88            | 207           | 32            | 1147      |
| Total                          | 2026          | 4385          | 878           | 1376          | 714           | 9379      |

| Marginal Table: AREA by RISK |       |         |       |
|------------------------------|-------|---------|-------|
|                              | WORLD | VIETNAM | Total |
| CR                           | 2244  | 9       | 2254  |
| EN                           | 3552  | 113     | 3666  |
| VU                           | 2234  | 77      | 2312  |
| DD                           | 1102  | 44      | 1147  |
| Total                        | 9134  | 245     | 9379  |

## References

1. Bain RH and Nguyen QT (2004a) Herpetofaunal diversity of Ha Giang Province in northeastern Vietnam, with descriptions of two new species. *American Museum Novitates* 3453: 1-42
2. Bain R.H and Nguyen QT (2004b) Three new species of narrow-mouth frogs (genus: *Microhyla*) from Indochina, with comments on *Microhyla annamensis* and *Microhyla palmipes*. *Copeia* 2004: 507-524
3. Bernardes M, Le MD, Nguyen TQ, Van Pham A, Nguyen TT, Rödder D, Bonkowski M and Ziegler T (2020) Integrative taxonomy reveals three new taxa within the *Tylototriton asperrimus* complex (Caudata, Salamandridae) from Vietnam. *ZooKeys* 935: 121-164
4. Bossuyt F and Dubois A (2001) A review of the frog genus *Philautus* Gistel, 1848 (Amphibia, Anura, Ranidae, Rhacophorinae). *Zeylanica* 6: 1-112
5. Bourret R (1937) Notes herpétologiques sur l'Indochine française. XIV. Les Batraciens de la collection du Laboratoire des Sciences Naturelles de l'Université. Descriptions de quinze espèces ou variétés nouvelles. *Annexe Bull. gén. Instr. publ* 4: 5-56
6. Bourret R (1942) *Les Batraciens de l'Indochine*. Institut Oceanographique de l'Indochine
7. Do DT, Ngo CD and Nguyen TQ (2017) New records and an updated checklist of amphibians (Amphibia) from Phu Yen Province, Vietnam. *Hue University Journal of Science: Natural Science* 126(1B): 81-94
8. Geissler P, Poyarkov NA Jr, Grismer L, Nguyen TQ, An HT, Neang T, Kupfer A, Ziegler T, Böhme W and Müller H (2014) New *Ichthyophis* species from Indochina (Gymnophiona, Ichthyophiidae): 1. The unstriped forms with descriptions of three new species and the redescrptions of *I. acuminatus* Taylor, 1960, *I. youngorum* Taylor, 1960 and *I. laosensis* Taylor, 1969. *Organisms Diversity & Evolution* 15(1): 143-174
9. Gorin VA, Solovyeva EN, Hasan M, Okamiya H, Karunaratna DS, Pawangkhanant P, de Silva A, Juthong W, Milto KD, Nguyen LT and Suwannapoom C (2020) A little frog leaps a long way: compounded colonizations of the Indian Subcontinent discovered in the tiny Oriental frog genus *Microhyla* (Amphibia: Microhylidae). *PeerJ* 8: e9411
10. Hoang VC, Jiang J, Nguyen QH, Orlov N, Le VM, Nguyen VH, Nguyen VT, Nguyen TT, Ziegler T (2021a) A new species of *Vietnamophryne* from Vietnam. *Rev Suisse Zool* 128: 207-219
11. Hoang VC, Luong MA, Nguyen QT, Orlov NL, Chen Y, Wang B, Jiang J (2020) A new species of *Microhyla* (Amphibia: Anura: Microhylidae) from Langbian Plateau, central Vietnam. *Asian Herpetol Res* 11: 161-182
12. Hoang CV, Nguyen TT, Ninh HT, Luong AM, Pham CT, Nguyen TQ, Orlov NL, Chen Y, Wang B, Ziegler T, Jiang J (2021b) Two new cryptic species of *Microhyla* Tschudi, 1838 (Amphibia, Anura, Microhylidae) related to the *M. heymonsi* group from central Vietnam. *ZooKeys* 1036: 47-74
13. Hoang CV, Nguyen TT, Phan TQ, Pham CT, Ninh HT, Wang B, Jiang J, Ziegler T, Nguyen TQ (2022) Distribution pattern of the *Microhyla heymonsi* group (Anura, Microhylidae) with descriptions of two new species from Vietnam. *Eur J Taxon* 846: 1–41
14. Inger RF, Orlov N and Darevsky IS (1999) Frogs of Vietnam: A report on new collections. *Fieldiana: Zoology* 92: 1-46
15. Lathrop A, Murphy RW, Orlov NL, Cuc TH (1998) Two new species of *Leptolalax* (Anura: Megophryidae) from northern Vietnam. *Amphibia-Reptilia* 19(3):253-267
16. Le DT, Do YT, Tran TT, Nguyen TQ, Orlov NL, Ninh HT, Nguyen TT (2021) A new species of *Gracixalus* (Anura: Rhacophoridae) from Northern Vietnam. *Russ J Herpetol*, 28(3)
17. Luong AM, Hoang CV, Pham CT, Nguyen TT, Orlov NL, Ziegler T, Nguyen TQ. 2022. A new species of *Xenophrys* (Amphibia: Anura: Megophryidae) from Truong Son Range, Vietnam. *Zootaxa* 5150: 333-356
18. Nguyen LT, Poyarkov Jr NA, Nguyen TT, Nguyen TA, Tran VH, Gorin VA, Murphy RW and Nguyen SN (2019) A new species of the genus *Microhyla* Tschudi, 1838 (Amphibia: Anura: Microhylidae) from Tay Nguyen Plateau, Central Vietnam. *Zootaxa* 4543(4): 549-580
19. Nguyen LT, Tapley B, Nguyen CT, Van Luong H, Rowley JJ (2021a) A new species of *Leptobrachella* (Anura, Megophryidae) from Mount Pu Ta Leng, northwest Vietnam. *Zootaxa*, 5016(3), 301-332
20. Nguyen TN and Luu QV (2018) New record of *Theloderma annae* Nguyen, Pham, Ngo, Nguyen Ziegler, 2016 (Anura: Rhacophoridae) from Ninh Binh Province, Vietnam. *Vietnam National University of Forestry Journal of Forestry Science and Technology* 5: 104-110
21. Nguyen TQ, Pham CT, Nguyen TT, Ngo HN and Ziegler T (2016) A new species of *Theloderma* (Amphibia: Anura: Rhacophoridae) from Vietnam. *Zootaxa* 4168(1): 171–186
22. Nguyen TQ, Pham CT, Nguyen TT, Luong AM and Ziegler T (2020a) A new species of *Megophrys* (Amphibia: Anura: Megophryidae) from Vietnam. *Zootaxa* 4722: 401–422
23. Nguyen TT, Cuong The Pham, Nguyen TQ, Ninh HT and Ziegler T (2017) A new species of *Rhacophorus* (Amphibia: Anura: Rhacophoridae) from Vietnam. *Asian Herpetological Research* 8: 221-234
24. Nguyen TT, Matsui M, Yoshikawa N (2014) First record of the tree- frog genus *Liuixalus* from Vietnam with the description of a new species (Amphibia: Rhacophoridae). *Curr Herpetol* 33: 29-37
25. Nguyen TT, Ninh HT, Orlov N, Nguyen TQ, Ziegler T (2020b) A new species of the genus *Zhangixalus* (Amphibia: Rhacophoridae) from Vietnam. *J Nat Hist*
26. Nguyen TV, Duong TV, Luu KT and Poyarkov Jr NA (2020c) A new species of *Kurixalus* (Anura: Rhacophoridae) from northern Vietnam with comments on the biogeography of the genus. *Journal of Natural History*. London: 1-29
27. Nguyen TV, Hoang CV, Jianping J, Orlov NL, Ninh HT, Nguyen HQ, Nguyen TT, Ziegler T (2021b) A New Species of *Vietnamophryne* with an Extended Description of *Vietnamophryne orlovi*. *Russ J Herpetol* 28(6):355-368
28. Ninh HT, Nguyen TT, Orlov N, Nguyen T, Ziegler T (2020) A New Species of the Genus *Zhangixalus* (Amphibia: Rhacophoridae) from Vietnam. *Eur J Taxon* 688: 1–18

29. Ninh HT, Nguyen TT, Nguyen HQ, Hoang NV, Siliyavong S, Nguyen TV, Le DT, Le QK, and Ziegler T (2022) A new species of mossy frog (Anura: Rhacophoridae) from Northeastern Vietnam. *Eur J Taxon* 794: 72–90
30. Ohler A, Wollenberg KC, Grosjean S, Hendrix R, Vences M, Ziegler T and Dubois A (2011) Sorting out *Lalos*: description of new species and additional taxonomic data on megophryid frogs from northern Indochina (genus *Leptolalax*, Megophryidae, Anura). *Zootaxa* 3147: 1-83
31. Ostroshabov AA, Orlov NL and Nguyen TT (2013) Taxonomy of frogs of genus *Rhacophorus* of "*hoangliensis* - *orlovi*" complex. *Russian Journal of Herpetology* 20(4): 301-324
32. Pham CT, Do DT, Le MD, Ngo HT, Nguyen LT, Ziegler T, Nguyen TQ (2020) A new species of *Limnonectes* (Amphibia: Anura: Dicroglossidae) from Vietnam. *Zootaxa*, 4894(3), 387–402.
33. Pham CT, Nguyen TQ, Le MD, Bonkowski M and Ziegler T (2016) A new species of *Odorrana* (Amphibia: Anura: Ranidae) from Vietnam. *Zootaxa* 4084(3): 421-435
34. Poyarkov NA Jr, Nguyen TV, Trofimets AV, Gorin VA (2020) A new cryptic species of the genus *Microhyla* (Amphibia: Microhylidae) from Langbian Plateau, Vietnam. *Taprobanica* 9: 136-163
35. Poyarkov NA, Nguyen TV, Akrhipov DV (2021a) A new species of the genus *Tylotriton* (Amphibia, Caudata, Salamandridae) from central Vietnam. *Taprobanica* 10: 4–22
36. Poyarkov NA, Nguyen TV, Yang J-H, Gorin VA (2021b) A new species of *Micryletta* (Amphibia: Anura: Microhylidae) from the Langbian Plateau in southern Vietnam. *Zool Res* 42(6): 726-733
37. Poyarkov NA, Suwannapoom C, Pawangkhanant PP, Aksornneam A, Duong TV, Korost DV and Che J (2018) A new genus and three new species of miniaturized microhylid frogs from Indochina (Amphibia: Anura: Microhylidae: Asterophryinae). *Zoological Research* 39(3): 130–157
38. Poyarkov Jr NA, Vassilieva AB, Orlov NL, Galoyan EA, Tran DTA, Le DTT, Kretova VD and Geissler P (2014) Taxonomy and distribution of narrow-mouth frogs of the genus *Microhyla* Tschudi, 1838 (Anura: Microhylidae) from Vietnam with descriptions of five new species. *Russian Journal of Herpetology* 21: 89-148
39. Rowley JLL, Hoang HD, Le TTD, Dau VQ, Cao TT (2010) A new species of *Leptolalax* (Anura: Megophryidae) from Vietnam and further information on *Leptolalax tuberosus*. *Zootaxa* 2660:33-45
40. Rowley JJ, Le DTT, Hoang HD, Cao TT, Dau VQ (2020) A new species of phytotelm breeding frog (Anura: Rhacophoridae) from the Central Highlands of Vietnam. *Zootaxa*, 4779(3), 341-354
41. Schenkel E (1901) Achter Nachtrag zum Katalog der herpetologischen Sammlung des Basler Museums. *Verhandlungen der Naturforschenden Gesellschaft in Basel* 13: 142-199
42. Tapley B, Cutajar T, Nguyen LT, Portway C, Mahony S, Nguyen CT, Harding L, Luong HV, Rowley JLL. (2021) A new potentially Endangered species of *Megophrys* from Mount Ky Quan San, northwest Vietnam. *J Nat Hist* 54: 2543-2575
